# Supplementary material
Source: publisher site journal article supplement (https://www.dovepress.com/article/353036)

**Supplementary Figure 1:** Flow diagram of the study.

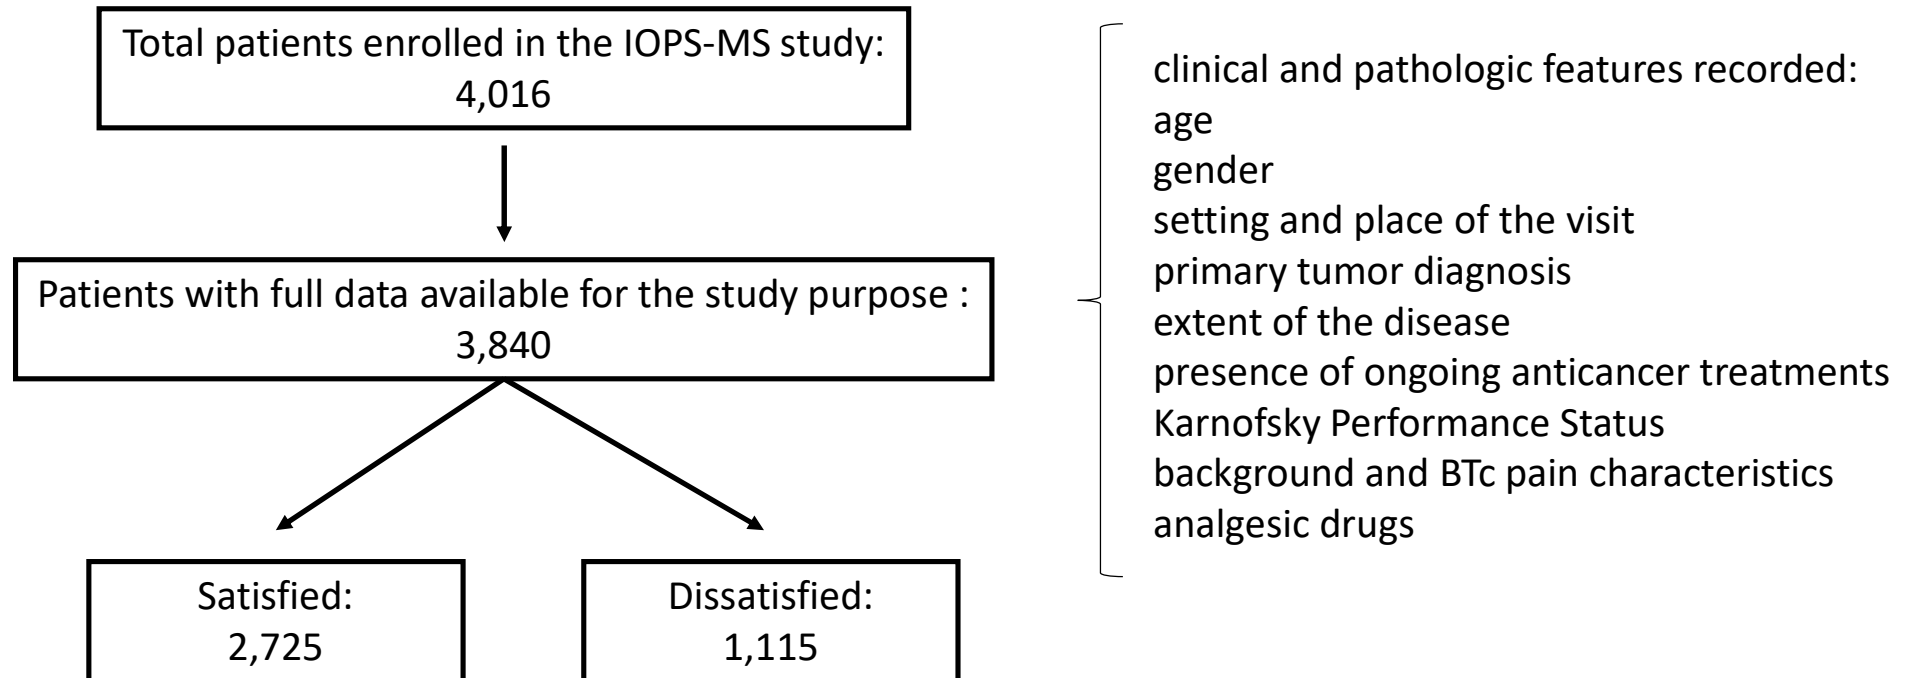

Supplement: Supplementary file 1 [file get_supplementary_file.php]
